# Supplementary material
Source: Springer Nature journal article supplement (https://www.springermedizin.de/resource/supplementary/12991_2009_1034_MOESM1_ESM.pdf/9615620)
Supplement: MOESM1 [file 9615620]

## Age and HTQ

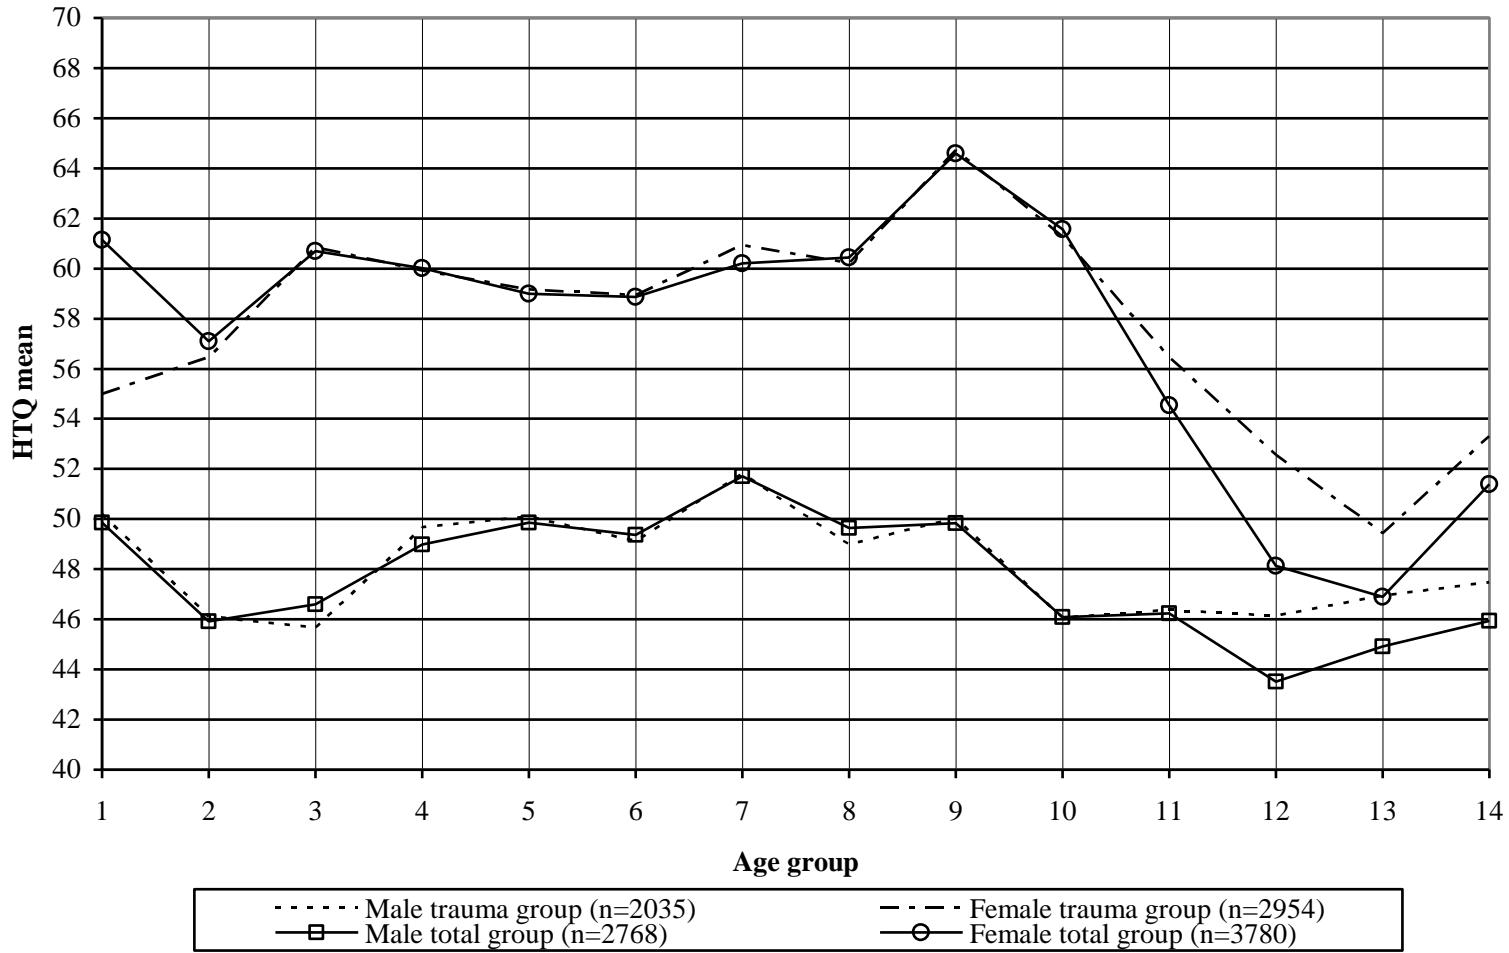

Note: HTQ (= Harvard Trauma Questionnaire) mean scores by gender and age are shown for the total sample and the trauma sample, respectively.

Age group 1: 11-15 years of age  
 Age group 5: 31-35 years of age  
 Age group 9: 51-55 years of age  
 Age group 13: 71-75 years of age

Age group 2: 16-20 years of age  
 Age group 6: 36-40 years of age  
 Age group 10: 56-60 years of age  
 Age group 14: 76-80 years of age

Age group 3: 21-25 years of age  
 Age group 7: 41-45 years of age  
 Age group 11: 61-65 years of age

Age group 4: 26-30 years of age  
 Age group 8: 46-50 years of age  
 Age group 12: 66-70 years of age
